# Supplementary material
Source: PubMed Central journal article supplement (PMC6082914)
Supplement: 41422_2018_52_MOESM7_ESM.pdf [file 41422_2018_52_MOESM7_ESM.pdf]

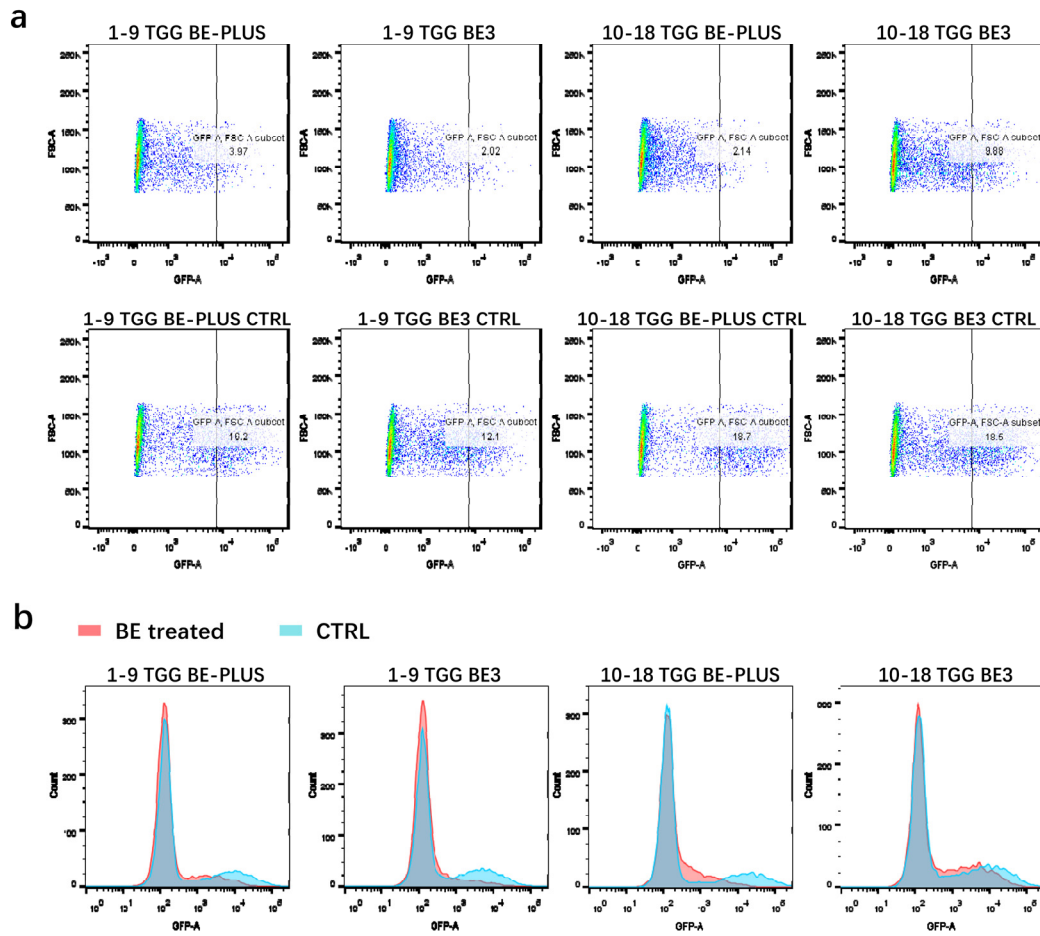

**Figure S7 Flow cytometry analysis of BE-PLUS-mediated iSTOP in the GFP-iSTOP reporter system.**

- a. Flow cytometry analysis of GFP shutdown by BE-PLUS or BE3 in the 1-9 TGG or 10-18 TGG target vector. The fluorescence of the HEK293FT cells was quantified. The selected region of high-GFP cells were counted to determine knockouts. The data shows a representative experiment from three independent experiments.
- b. Analysis of GFP knockout based on peak shifting of green fluorescence in histograms. The relative fluorescence intensity was measured. The negative control is indicated in blue, and the base editor treated sample is indicated in red.
