# Supplementary material
Source: PubMed Central journal article supplement (PMC6082914)
Supplement: 41422_2018_52_MOESM10_ESM.pdf [file 41422_2018_52_MOESM10_ESM.pdf]

**Table S1 The sgRNA sequences for the reporter system.**

| <b>sgRNA name</b> | <b>sgRNA sequence</b>   |
|-------------------|-------------------------|
| <b>sgF1</b>       | TCTGCCGTCATCGACTTCGAAGG |
| <b>sgF2</b>       | CGAACCTTCGAAGTCGATGACGG |
| <b>sgF3</b>       | GAATCCTTCCCCTCTAACCACGG |
| <b>sgL1</b>       | TCTTCTAGAGGGTTCTCGAGCGG |
