# Supplementary material
Source: PubMed Central journal article supplement (PMC6082914)
Supplement: 41422_2018_52_MOESM11_ESM.pdf [file 41422_2018_52_MOESM11_ESM.pdf]

**Table S2 Primers for the reporter system.**

| <b>Primer name</b> | <b>Primer sequence</b> |
|--------------------|------------------------|
| <b>SupF For</b>    | ATAATGTGTGGAGCAGGCCAG  |
| <b>SupF Rev</b>    | AACAGGAGAGCGCACGAGGGA  |
