# Supplementary material
Source: PubMed Central journal article supplement (PMC6082914)
Supplement: 41422_2018_52_MOESM12_ESM.pdf [file 41422_2018_52_MOESM12_ESM.pdf]

**Table S3 The sgRNA sequences of endogenous gene loci.**

| Target site       | Target site (5' → 3')    | Chromosome | Start     | End       | Sequence ID  |
|-------------------|--------------------------|------------|-----------|-----------|--------------|
| <b>DNMT3B</b>     | AGAGCCCCCCTCAAAGAGAGGG   | chr20      | 31288089  | 31288111  | NC_018931.2  |
| <b>EMX1</b>       | TGCCCCTCCCTCCCTGGCCCAGG  | chr2       | 73091078  | 73091100  | NC_018913.2  |
| <b>FAP site 1</b> | GTCCAATTCAGTATTTATGCTGG  | chr2       | 162219874 | 162219896 | NC_000002.12 |
| <b>FANCF</b>      | GGAATCCCTTCTGCAGCACCTGG  | chr11      | 22625786  | 22625808  | NC_000011.10 |
| <b>FAP</b>        | GACAATGCACATCACCAATAAGG  | chr2       | 163105320 | 163105342 | NC_018913.2  |
| <b>IDO1</b>       | AGGTCATGGAGATGTCCGTAAGG  | chr8       | 39822307  | 39822329  | NC_018919.2  |
| <b>MYOD1</b>      | CCAGCAGCTGGTCACAAAGCTGG  | chr11      | 17720922  | 17720944  | NC_018922.2  |
| <b>PPEF2</b>      | G TTCATACTCACTGTCGTTGTGG | chr4       | 76789442  | 76789464  | NC_018915.2  |
| <b>IGF1</b>       | GAGCGTCTCCGGTCCAGCCGTGG  | chr12      | 102836204 | 102836226 | NC_018923.2  |
