# Supplementary material
Source: PubMed Central journal article supplement (PMC6082914)
Supplement: 41422_2018_52_MOESM13_ESM.pdf [file 41422_2018_52_MOESM13_ESM.pdf]

**Table S4. The sequences of off-target sites.**

| Off-target site name | Target site (5' → 3')   | Chromosome | Start     | End       | Sequence ID |
|----------------------|-------------------------|------------|-----------|-----------|-------------|
| DNMT3B OTS1          | TGACTCCACCCTCAAAGAGATGG | chr9       | 110044660 | 110044682 | NC_018920.2 |
| DNMT3B OTS2          | AGATCCCTCCCTCAAACAGAGGG | chr21      | 45240165  | 45240187  | NC_018932.2 |
| DNMT3B OTS3          | AAATCCCCCCTTAAAGAGATGG  | chr8       | 119849111 | 119849133 | NC_018919.2 |
| DNMT3B OTS4          | ACAGCCCCCACTAAAAGAGAAGG | chr1       | 56912918  | 56912940  | NC_018912.2 |
| DNMT3B OTS5          | AAAGCCACCCTCAAAGAGCTGG  | chr17      | 27091752  | 27091774  | NC_018928.2 |
| DNMT3B OTS6          | ATAACCCCCACACAAAGAGAGGG | chr11      | 28492092  | 28492114  | NC_018922.2 |
| MYOD1 OTS1           | CCAGCATCTGGTCACAAGGCAGG | chr11      | 68097810  | 68097832  | NC_018922.2 |
| MYOD1 OTS2           | GCAGCTGCTGTTCACAAAGCAGG | chr9       | 110838702 | 110838724 | NC_018920.2 |
| MYOD1 OTS3           | GCACCAGCTGGTCAGAAAGCTGG | chr3       | 15168177  | 15168199  | NC_018914.2 |
| MYOD1 OTS4           | CATCCAGCTGTTCACAAAGCTGG | chrX       | 129783770 | 129783792 | NC_018934.2 |
| EMX1 OTS1            | TGCCCCGCCCTCCCTGGCCTGGG | chr19      | 10516439  | 10516461  | NC_018930.2 |
| EMX1 OTS2            | AGCACCCCCCTCCCTGGCCCCGG | chr17      | 17702111  | 17702133  | NC_018928.2 |
| EMX1 OTS3            | GGCCCCTGCCTCCCTGGCCACGG | chr11      | 60501562  | 60501584  | NC_018922.2 |
