# Supplementary material
Source: PubMed Central journal article supplement (PMC6082914)
Supplement: 41422_2018_52_MOESM14_ESM.pdf [file 41422_2018_52_MOESM14_ESM.pdf]

**Table S5 Primers for on-target sites.**

| Primer name    | Primer sequence            | Chr   | Start     | End       | Interval (bp) |
|----------------|----------------------------|-------|-----------|-----------|---------------|
| DNMT3B for     | CTGGTGT CAGGGCCTCAACTG     | chr20 | 31287995  | 31288215  | 221           |
| DNMT3B rev     | CTGAGTCTCCACACAGGTGCTG     |       |           |           |               |
| EMX1 for       | GGGGCCCCTAACCCCTATGTA      | chr2  | 73090971  | 73091210  | 240           |
| EMX1 rev       | CCACCGGTTGATGTGATGGG       |       |           |           |               |
| FAP site 1 for | GCAATTAACAGCAAGGTTTGTG     | chr2  | 162219767 | 162219973 | 207           |
| FAP site 1 rev | CAGGCAGGGAAATTAACAAAGG     |       |           |           |               |
| FANCF for      | AGAGGCGTATCATTTCGCGGATG    | chr11 | 22625674  | 22625900  | 227           |
| FANCF rev      | CGATGGATGTGGCGCAGGTAG      |       |           |           |               |
| FAP for        | AGGTGTAAACAAAATCTTGCCAT    | chr2  | 163105223 | 163105465 | 243           |
| FAP rev        | TGTTCAACCACTTGTGATCTTGC    |       |           |           |               |
| IDO1 for       | GTCAATTGCTCCATTTGTTTTTCAGT | chr8  | 39822185  | 39822454  | 270           |
| IDO1 rev       | TTTTGTCGTGTTATCTAACTTTGC   |       |           |           |               |
| MYOD1 for      | CAGGGGGAACACCAAGGAACA      | chr11 | 17720798  | 17721039  | 242           |
| MYOD1 rev      | ACTCTGGGCGCCACGTATTG       |       |           |           |               |
| PPEF2 for      | GTGAGGCCAACTGGACTACTT      | chr4  | 76789350  | 76789587  | 238           |
| PPEF2 rev      | GCTGTCACCAGATTCACGGT       |       |           |           |               |
| IGF1 for       | GCAGGTGAAGATGCACACCATG     | chr12 | 102836111 | 102836303 | 193           |
| IGF1 rev       | TGAGCAGCACATTGAGAGGG       |       |           |           |               |
