# Supplementary material
Source: PubMed Central journal article supplement (PMC6082914)
Supplement: 41422_2018_52_MOESM15_ESM.pdf [file 41422_2018_52_MOESM15_ESM.pdf]

**Table S6 Primers for off-target sites.**

| Primer name        | Primer sequence                | Chr   | Start     | End       | Interval (bp) |
|--------------------|--------------------------------|-------|-----------|-----------|---------------|
| DNMT3B<br>OTS1 for | GCTGGATGGAGCTGGGTCAG           | chr9  | 110044560 | 110044779 | 220           |
| DNMT3B<br>OTS1 rev | GGTCAAACCTGGGGGCCCATG          |       |           |           |               |
| DNMT3B<br>OTS2 for | CTTGGAAGGAGCAAAGCAAGG          | chr21 | 45240069  | 45240288  | 220           |
| DNMT3B<br>OTS2 rev | CGTCTGCTGTATTTGACAGCACTG       |       |           |           |               |
| DNMT3B<br>OTS3 for | CCTCTTTATTGGCTACCACTTC         | chr8  | 119849028 | 119849256 | 229           |
| DNMT3B<br>OTS3 rev | GAAATCTTGAAGATATCTTGGAAAATAGGG |       |           |           |               |
| DNMT3B<br>OTS4 for | TCCTATCTCCATGTCTTTTGGATCTG     | chr1  | 56912818  | 56913042  | 225           |
| DNMT3B<br>OTS4 rev | ACTGCCCTGGGGTTTTAATCTAA        |       |           |           |               |
| DNMT3B<br>OTS5 for | TGCTGCTGCCACCGCTTCCTG          | chr17 | 27091669  | 27091880  | 212           |
| DNMT3B<br>OTS5 rev | CCCCAGGCAGTCTGATGTAGAAG        |       |           |           |               |
| DNMT3B<br>OTS6 for | CATTACTCTGAGTTGCGAGGCAAG       | chr11 | 28492013  | 28492244  | 232           |
| DNMT3B<br>OTS6 rev | TATCTAGCACACCCTCAGAGAAG        |       |           |           |               |
| MYOD1<br>OTS1 for  | ACTGGTGTGGAGGACACTCAG          | chr11 | 68097711  | 68097909  | 199           |
| MYOD1<br>OTS1 rev  | TGCCCCGAAGGTCATCTCAG           |       |           |           |               |
| MYOD1<br>OTS2 for  | CAGCAGCATTCTGATGATGAAAGC       | chr9  | 110838618 | 110838838 | 221           |
| MYOD1<br>OTS2 rev  | GAAGAAAGCATGCGAACACACTGG       |       |           |           |               |
| MYOD1<br>OTS3 for  | GCAACATGCTGAGAAAGGGAATG        | chr3  | 15168080  | 15168316  | 237           |
| MYOD1<br>OTS3 rev  | AGATTTCTGCTGCAGAGAGG           |       |           |           |               |
| MYOD1<br>OTS4 for  | GGCCCCATCAGTTACCTTGAAATG       | chrX  | 129783698 | 129783886 | 189           |
| MYOD1<br>OTS4 rev  | AATTTCTGCCACCTCCGCAGAG         |       |           |           |               |

|                  |                           |       |          |          |     |
|------------------|---------------------------|-------|----------|----------|-----|
| EMX1<br>OTS1 for | GGCTCTCACAATCGCACACAC     | chr19 | 10516361 | 10516589 | 229 |
| EMX1<br>OTS1 rev | GGTACGACTTTCCTGGGGAG      |       |          |          |     |
| EMX1<br>OTS2 for | CACCACCCCTTCTCCCTCCAG     | chr17 | 17702008 | 17702216 | 209 |
| EMX1<br>OTS2 rev | GGACACAGAAGGCGAGGCAGG     |       |          |          |     |
| EMX1<br>OTS3 for | CAGCTACGACTGTGGGATCAAGG   | chr11 | 60501462 | 60501716 | 255 |
| EMX1<br>OTS3 rev | CCCTGGGTGATGATTCTCCTCCTTG |       |          |          |     |
