# Supplementary material
Source: PubMed Central journal article supplement (PMC6082914)
Supplement: 41422_2018_52_MOESM16_ESM.pdf [file 41422_2018_52_MOESM16_ESM.pdf]

**Table S7 Primers for the GFP-iSTOP reporter system.**

| <b>Primer name</b>      | <b>Primer sequence</b>           |
|-------------------------|----------------------------------|
| <b>GFP-iSTOP-c9-For</b> | <b>CTCAGTACAATCTGCTCTGATGCCG</b> |
| <b>GFP-iSTOP-c9-Rev</b> | <b>GTTGCCGTCGTCCTTGAAGAAG</b>    |
