# Supplementary material
Source: PubMed Central journal article supplement (PMC6082914)
Supplement: 41422_2018_52_MOESM17_ESM.pdf [file 41422_2018_52_MOESM17_ESM.pdf]

**Table S8 The sgRNA sequences for iSTOP in endogenous genes.**

| <b>Target</b> | <b>Target site (5' → 3')</b> | <b>Chr.</b> | <b>Start</b> | <b>End</b> | <b>Sequence ID</b> |
|---------------|------------------------------|-------------|--------------|------------|--------------------|
| <b>NME1</b>   | AGGGATCGTCTTTCAAGGCGAGG      | Chr17       | 49296391     | 49296413   | NC_018928.2        |
| <b>RAD21</b>  | CAGCTTGAATCAGAGTAGAGTGG      | Chr8        | 117910882    | 117910904  | NC_018919.2        |
| <b>KCNS1</b>  | CACTGTGCCCCACCACCAGCAGG      | Chr20       | 43626588     | 43626610   | NC_018931.2        |
| <b>RAC1</b>   | TCCCATAAGCCCAGATTCACCGG      | Chr7        | 6391964      | 6391986    | NC_000007.14       |
| <b>KCNV2</b>  | CCGCGGCCACCACCAGGAGTGGG      | Chr9        | 2719402      | 2719425    | NC_018920.2        |
| <b>CDK10</b>  | TTCTCGGAGGCTCAGGTGCGTGG      | Chr16       | 91169506     | 91169528   | NC_018927.2        |
| <b>CDK10</b>  | GGCTCAGGTGCGTGGCAGAGGGG      | Chr16       | 91169514     | 91169536   | NC_018927.2        |
