# Supplementary material
Source: PubMed Central journal article supplement (PMC6082914)
Supplement: 41422_2018_52_MOESM18_ESM.pdf [file 41422_2018_52_MOESM18_ESM.pdf]

**Table S9 Primers for iSTOP in endogenous genes.**

| Primername | Primer sequence            | Chr   | Start     | End       | Interval |
|------------|----------------------------|-------|-----------|-----------|----------|
| NME1 for   | GGACAATTTATGCTTGCCCCG      | Chr17 | 49296088  | 49296674  | 587      |
| NME1 rev   | GCACCAGAATGAAGGCCAAAAC     |       |           |           |          |
| RAD21 for  | AGTGACTTCTGCATATTACATTGT   | Chr8  | 117910591 | 117911176 | 586      |
| RAD21 rev  | CAATATATAGGTTCTATGATTGCATA |       |           |           |          |
| KCNS1 for  | GCTGCCAACTGTAGTTGAAAGG     | chr20 | 43626296  | 43626909  | 614      |
| KCNS1 rev  | GGCTCTCTAGATCTGCAGACTG     |       |           |           |          |
| RAC1       | GTGCCGCCTTCCTCCTTGTGC      | Chr7  | 6391768   | 6392253   | 486      |
| RAC1       | CAACAATGGAACAGCTGGTAACGCTC |       |           |           |          |
| KCNV2 for  | GTGGGTAAGGTGGGTCAGGT       | Chr9  | 2719173   | 2719800   | 628      |
| KCNV2 rev  | GGTGGTCATAACCATCTCAAAGGC   |       |           |           |          |
| CDK10 for  | GTGTCTTGGGCTAGAGGTGTTG     | Chr16 | 91169221  | 91169754  | 534      |
| CDK10 rev  | CAACAGCCCAGGAAACCAGTGC     |       |           |           |          |
